# Supplementary material for: Convergent evolution of linked mating-type loci in basidiomycete fungi
Source: PubMed Central journal article supplement (PMC6730849; doi:10.1371/journal.pgen.1008365), 2019-09-06

**A**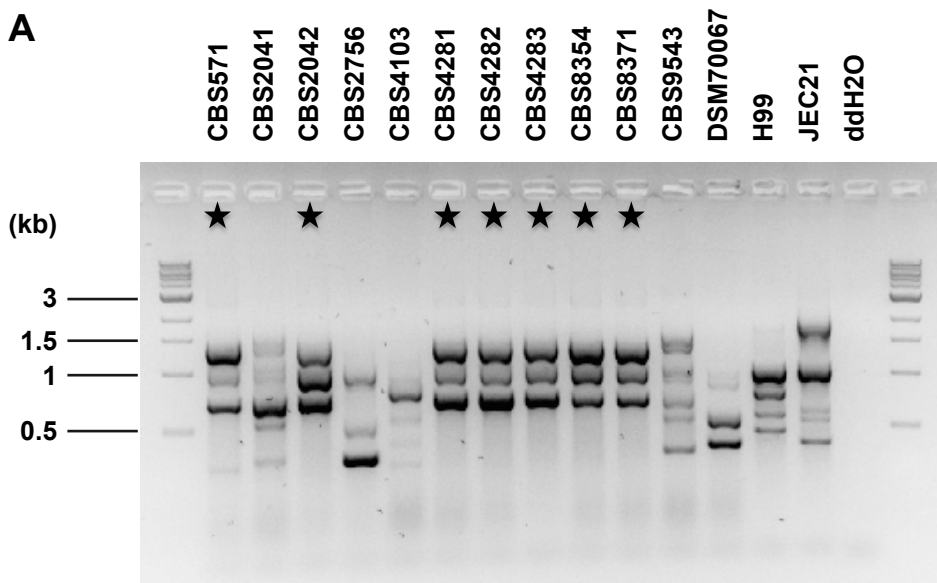

★ Strains with genotyping profiles that are consistent with that of the type strain of *V. humicola*, CBS571 (a.k.a. JCM1457).

**B**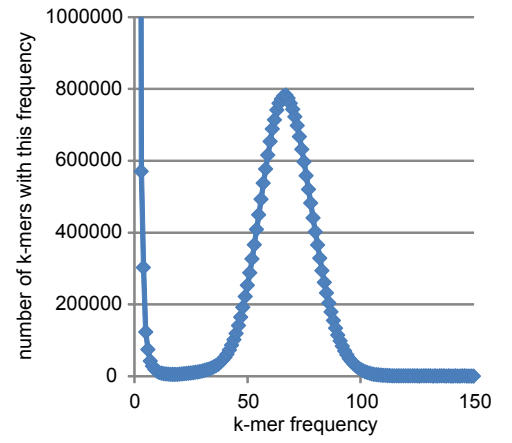**C**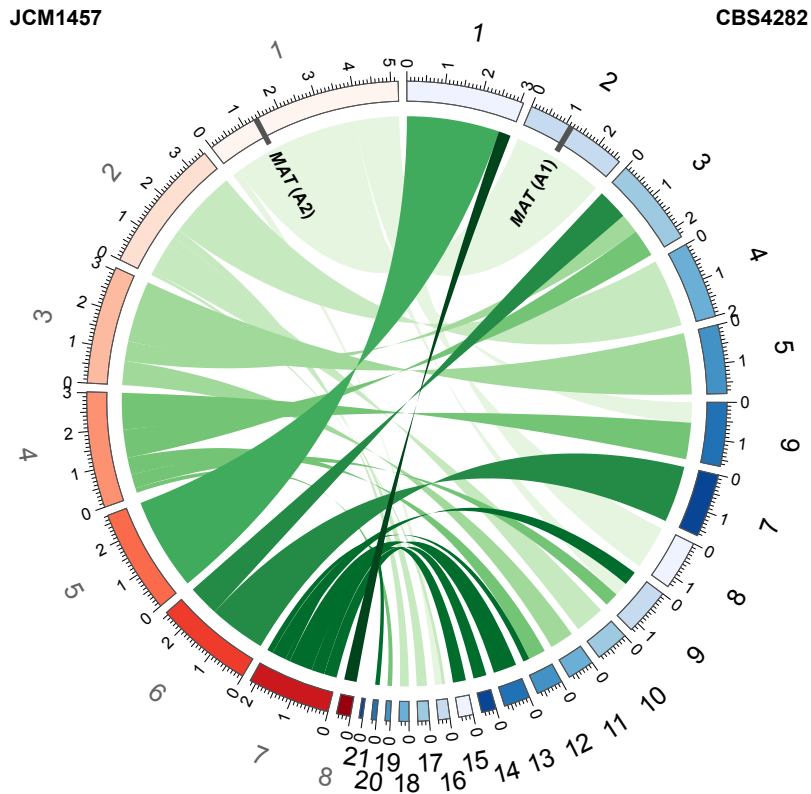

Supplement: pgen.1008365.s001.pdf [file pgen.1008365.s001.pdf]
