# Supplementary material for: Convergent evolution of linked mating-type loci in basidiomycete fungi
Source: PubMed Central journal article supplement (PMC6730849; doi:10.1371/journal.pgen.1008365), 2019-09-06
Supplement: pgen.1008365.s002.pdf [file pgen.1008365.s002.pdf]

## A

*T. asa.* EKC98308.1 HQTRREAAGVHYLRSWFLSNLAHPFFSRAERQKMASIASTTPRNVESSTFNWRRRSGWSAVRRKWWGGQ  
*T. asa.* EJT51135.1 HQTRREAAGVHYLRSWFLSNLAHPFFSRAERQKMASIASTTPRNVESSTFNWRRRSGWSAVRRKWWGGQ  
*T. cor.* 023\_162 Sxi1 CQSHLEAVDVDYLRSWFLSNLAHPFFSRAERQKMASITNSTPRNVESSTFNWRRRSGWLTIRRRWGGQ  
*T. ink.* 003\_681 Sxi1 NGMQPTESSTDYLRSWFLANLASPFENRTERQKMAKLMGTTTRNVESHFTNWRRRSGWSTIKKKWGGG  
*C. muc.* JCM9939 Sxi1 VAHEGKEADSRPLQAWFMANLAHPYFPLSVKRRFASELGLSLRNIDTQFTNWRRRSGWSAIKRRWADG  
*C. der.* JCM11170 Sxi1 VAHEGKEADSRPLQAWFMANLAHPYFPLSVKRRFASELGLSLRNIDTQFTNWRRRSGWSAIKRRWADG  
*C. arb.* JCM14201 Sxi1 EYDLGSRGQLNPLQRWFLDNLSPYFPLAVKRFQFSRELGLSLRNIDRRFTNWRRRTRWSDIKRWAGG  
*C. ole.* Triol1|175080 NKTDDSRDATRHLRAWFKNLDHPYFPLSLRQRFASELGVVPRNINAQFTNWRRRTGWSHIRKAWAGN  
*C. cur.* LLPE01 Sxi1 SDNDWDDDHQPLRDWFKHLDYFPPSRIEKRELAASLGLDARSIDSHLTNWRRRSGWNDIKRWATS  
*C. das.* JCM11166 Sxi1 SGSDVDAHPPATLQQWFISHLSHPFPPSRSEKRELANSLSLTPRNIDSQFTNWRRRTGWSDIKRWGKG  
*V. hum.* JCM1457 Sxi1 AQAKTECKSLLSLRSWFLQHLEDYFPPSPREKGEWAGLMGVTVRNVDSHFTNWRRRSGWNGIKQNWAHG  
*V. hum.* UJ1 Sxi1 AQAKTECKSLLSLRSWFLQHLEDYFPPSPREKGEWAGLMGVTVRNVDSHFTNWRRRSGWNGIKQNWAHG  
*C. neo.* Sxi1 AAN75718.1 PKPSEPPIDHTVRLWFLDNLAYPYFTAQQKDFLAKTAGIQRSDVSDLTNYRRRAGWTDIMNVWCGG  
*C. gat.* AAV28797.1 PKPLESAPDHTIVRLWFLNLAHPYFTAQQKDSLAKYAGMQRGKVDSDLTNYRRRAGWTDIMNMWCGG  
*T. kor.* JCM12878 Sxi1 DATPSQNVVRQLRRWFLDHLAWPYFTSSQKQILAKALSIAPKRVETQLTNWRRRSGWTDIKDLYAGG  
*N. alb.* LKPZ01 Sxi1 DPTNKADEADEHLRDWFLHAYPFPPDKPTKAVLSSTGLDVRQLNTWFTNMRSSGWTDYLSYASG  
*N. alb.* LLJT01 Sxi1 DPIDPADEADEHLRDWFLHAYPFPPDKPTKAVLSSTGLDVRQLNTWFTNMRSSGWTDYLSYASG  
*T. mel.* Sxi1 ADO17677.1 QONPLFPPTDPIRTWFLHAYPFPPDKPTKAVLSSTGLDVRQLNTWFTNMRSSGWTDYLSYASG  
*K. hev.* Sxi1 ACZ51516.1 SISRSPEPDHSLRIWFLHNSISYPYFTVSMKETLASKAGITRAKVDSDLTNFRRRAGWTEIMNEWCGG  
*X. den.* XDEN\_05476 RPRTEHPSSFRHLRDWFLIVHLDPYFSAQEKELALARNLTKNISINLWFTNMRSSGWMDFVRTHALN

helix I
  3 aa
  helix II
  helix III

## B

*C. neo.* Sxi2 AAV98474.1 RPSPFAPETLHVLESAYSRCVLSAAESALIAEAAASITPQQVRTWFQNKRRNGKKTRITSTVTQQVPH  
*C. gat.* Sxi2 AAV28762.1 RPSTFAPGTLNILESAYARCTILSAAETALIAEAAASITPQQVRTWFQNKRRNGKKTRITSSITQPVSH  
*T. fae.* 002\_950 Sxi2 RGANFRKRSLDVLEDAFARTPFLNKSECAMIARAAGLSSRQVRTWFQNKRRNVSKGS--ARKQA-KSQ  
*T. cor.* Sxi2 LRPLTLKRSLDILEDAFERTPFLNKSECAMVARASGLSSRQVRTWFQNKRRNVSKGSDSARKQE-KTG  
*T. ovo.* 001\_797 Sxi2 RGASFNTRSLDVLEEAFAFARTPFLNKRECAMVARAAALSSRQVRTWFQNKRRNVSKPTGSARKKTGRVS  
*T. ovo.* 014\_242 Sxi2 RGASFSGHSLKVLEEAFAFARTPFLNKSECAMVARAAALSSRQVRTWFQNKRRNVSKPAASARKKAKKDC  
*C. muc.* JCM9939 Sxi2 SNVQRGSSFKPILKDAFQRSQFLNKAECKLVAKAAGLSCQQVRTWFQNKRRNSSKSSSARRTSRTSR  
*C. cya.* JCM31388 Sxi2 VRLLSGHKTKQVLEDAFTRSPFLNKAECRLVAKAAGISTQQVRTWFQNKRRNSPKRPIRRRLNNSKAA  
*A. dom.* 002\_744 Sxi2 SVRKCYAETQQVLEAFARSFPLNKAECALVARAANLSPQQVRTWFQNRRSRAKNDVTATFVPLESK  
*V. fra.* JCM1530 Sxi2 TVADCLQRTKEMLEEAFAFARSFPLNKAECAMLAKASGLTARQLRTWFQNKRRNLKPEPPTTESLDAD  
*V. hum.* CBS4282 Sxi2 SRPAARPREDDQTSIAAYTRAPTLLHSECKMVARASGLTHQQVRTWFQNKRRSRDKKQSRIRSMRSTYRR  
*K. hev.* Sxi2 ACZ51517.1 KLSSFSSTLLVLDAAAYARSKLSQAETIIIAQAAGISPPQQVRTWFQNKRRNGKDKNPSTAAANRPVSS  
*T. tep.* JCM11965 Sxi2 SVIQGQHTLAVLERSYARSRNLSQAECSLVAKAARISHHQVRTWFQNRNRREIRKSRKMTMTASASH  
*X. den.* XDEN\_05477 RRSSFTKNTIDTLQALYDLNQYPNPIELKTIIVKVGLOPKQIRAWFQNRNRSSPARSHKKPLKIST

helix I
  helix II
  helix III
