# Supplementary material for: Convergent evolution of linked mating-type loci in basidiomycete fungi
Source: PubMed Central journal article supplement (PMC6730849; doi:10.1371/journal.pgen.1008365), 2019-09-06

**A**

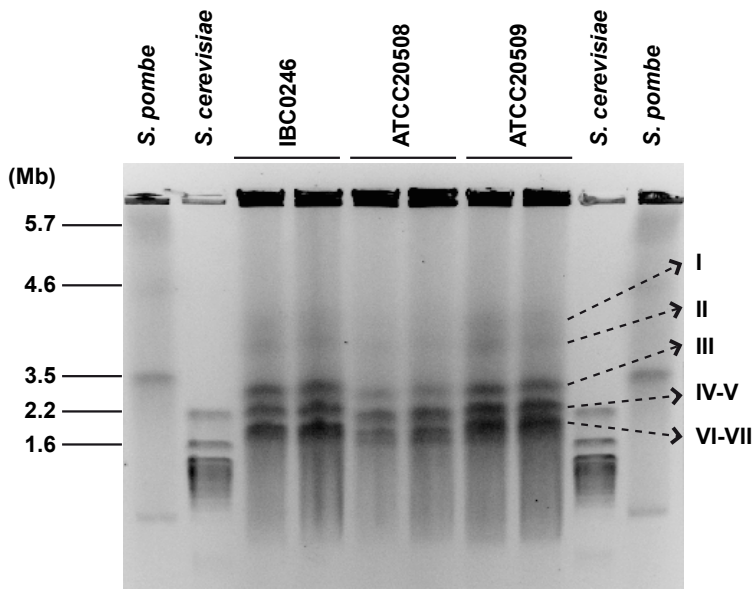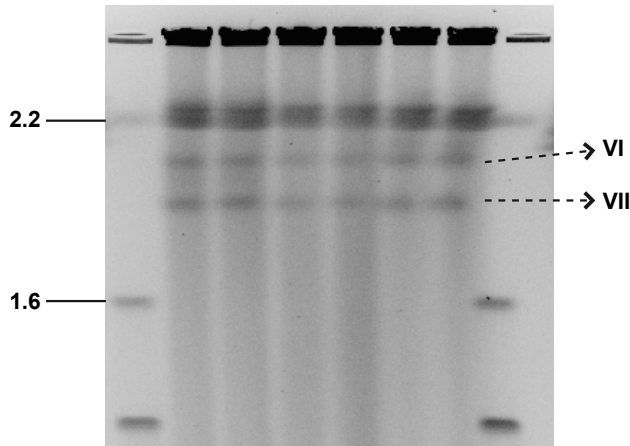

| Chromosome | Size (~est., Mb) | Potentially corresponding contig in ATCC20508 assembly | Contig size (Mb) |
|------------|------------------|--------------------------------------------------------|------------------|
| I          | 4                | 1                                                      | 4.1              |
| II         | 3.8              | 2                                                      | 3.8              |
| III        | 3                | 3                                                      | 3.2              |
| IV         | 2.3              | 4                                                      | 2.7              |
| V          | 2.3              | 5                                                      | 2.2              |
| VI         | 2                | 6                                                      | 2.0              |
| VII        | 1.8              | 7+8                                                    | 0.9+0.8          |
| Total      | 19.2             |                                                        | 19.8             |

**B**

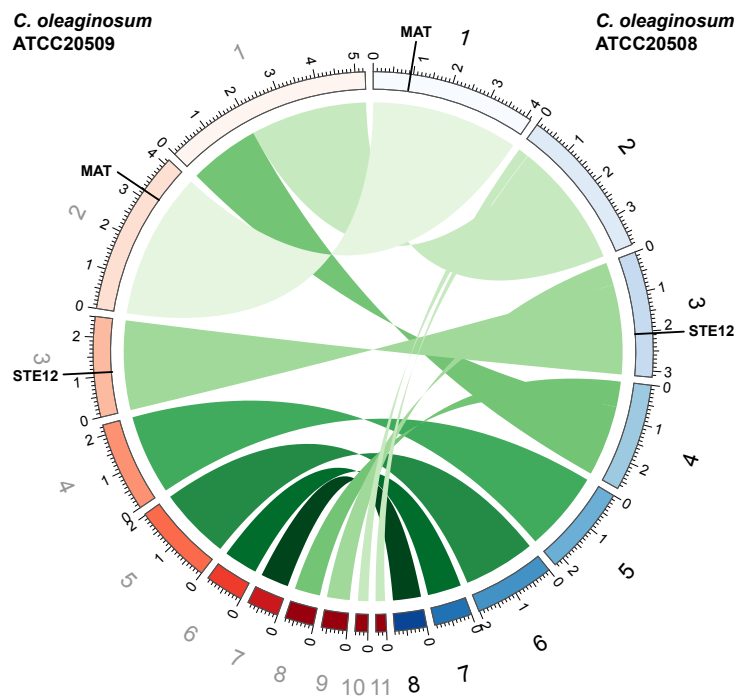

Supplement: pgen.1008365.s004.pdf [file pgen.1008365.s004.pdf]
