# Supplementary material for: Convergent evolution of linked mating-type loci in basidiomycete fungi
Source: PubMed Central journal article supplement (PMC6730849; doi:10.1371/journal.pgen.1008365), 2019-09-06

Key:

- U2 Unlinked *P/R* and *HD* loci, 2 *HD* genes per mating type
- L1 Linked *P/R* and *HD* loci, 1 *HD* gene per mating type
- L2 Linked *P/R* and *HD* loci, 2 *HD* genes per mating type
- ▼ old event of linkage of *P/R* and *HD* loci
- ▼ recent independent events of linkage of *P/R* and *HD* loci (previously reported)

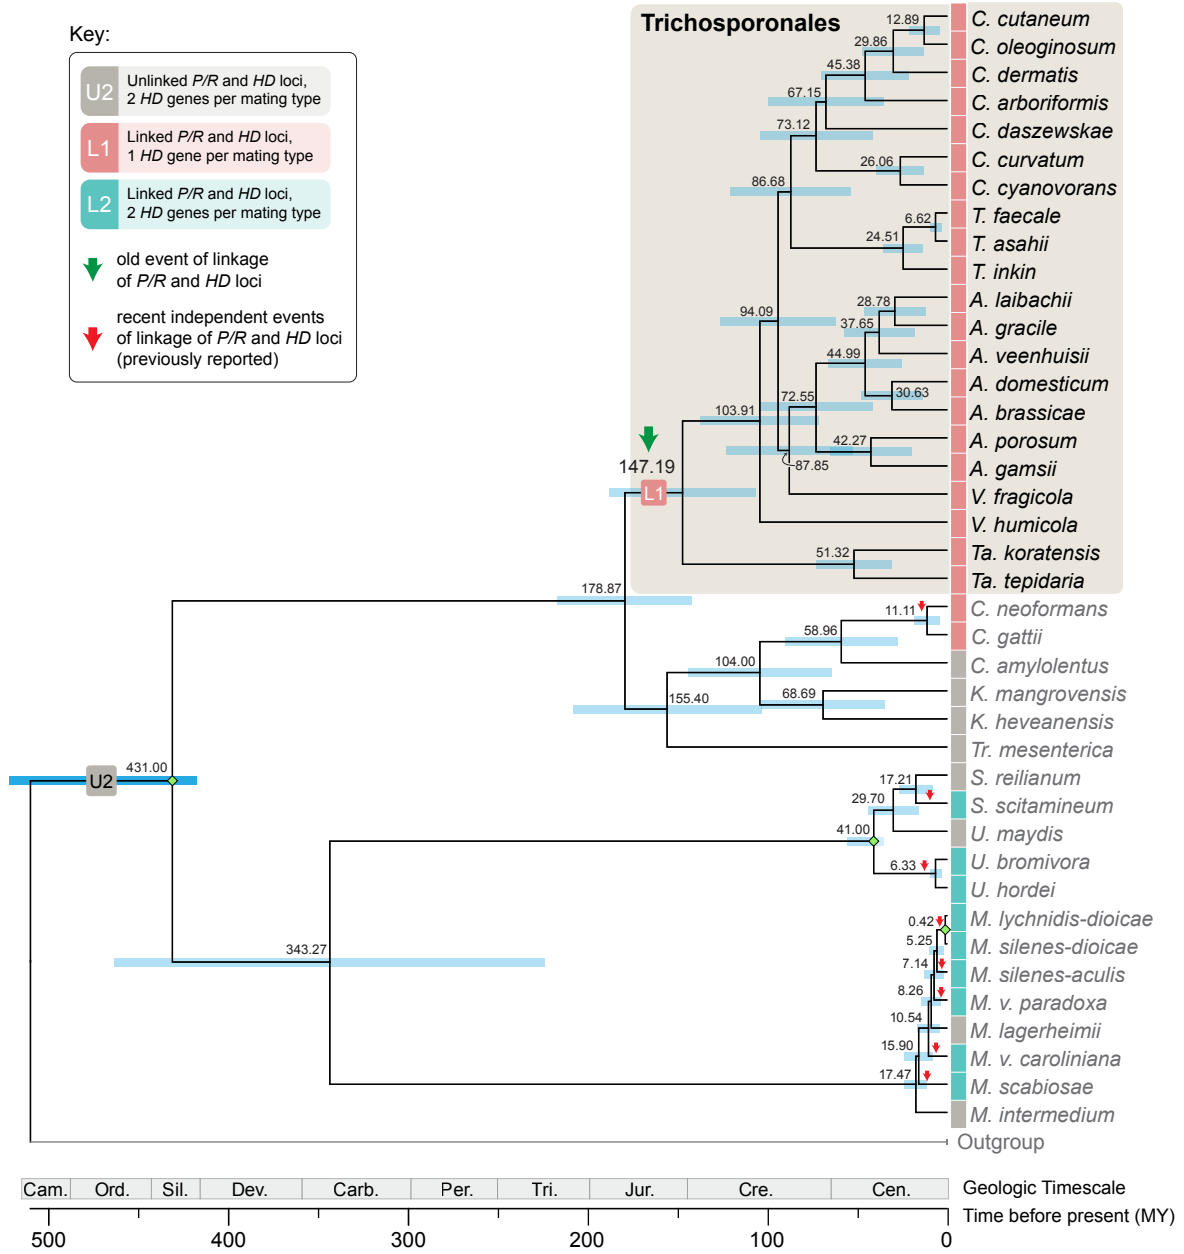

Supplement: pgen.1008365.s007.pdf [file pgen.1008365.s007.pdf]
