# Supplementary material for: Convergent evolution of linked mating-type loci in basidiomycete fungi
Source: PubMed Central journal article supplement (PMC6730849; doi:10.1371/journal.pgen.1008365), 2019-09-06
Supplement: pgen.1008365.s008.pdf [file pgen.1008365.s008.pdf]

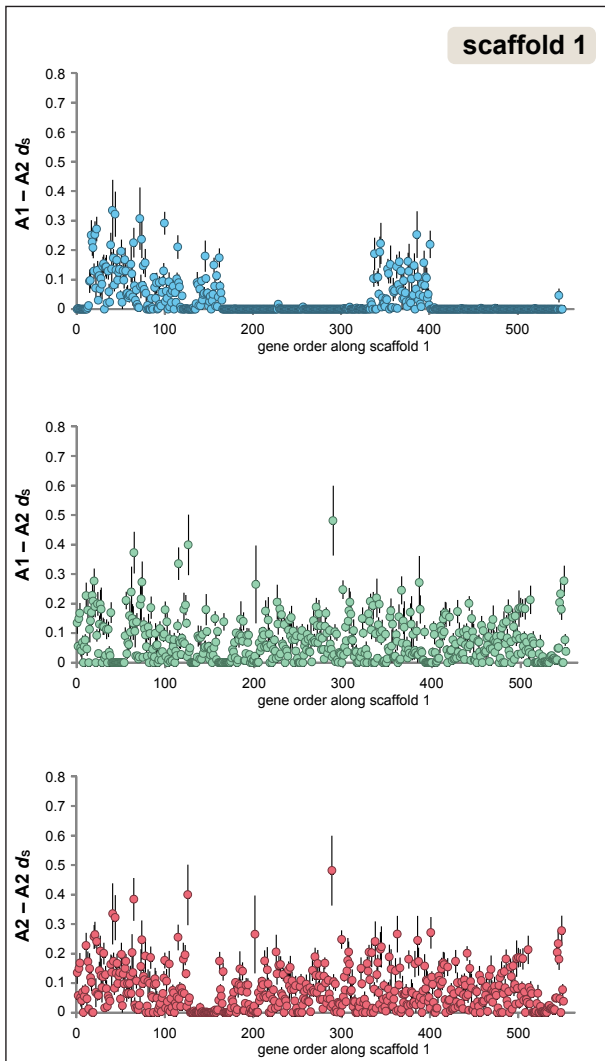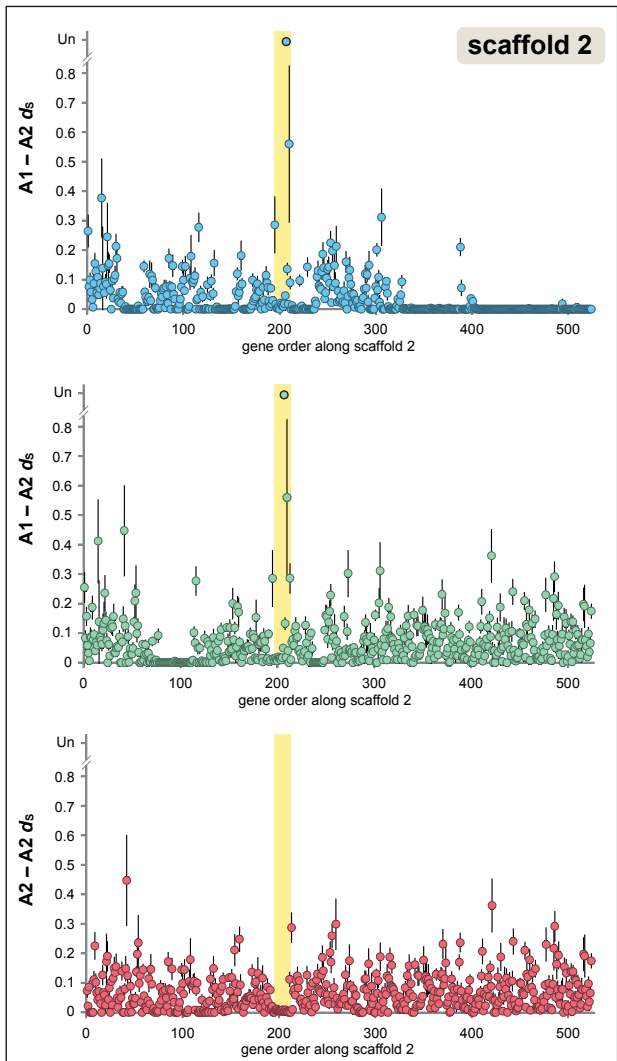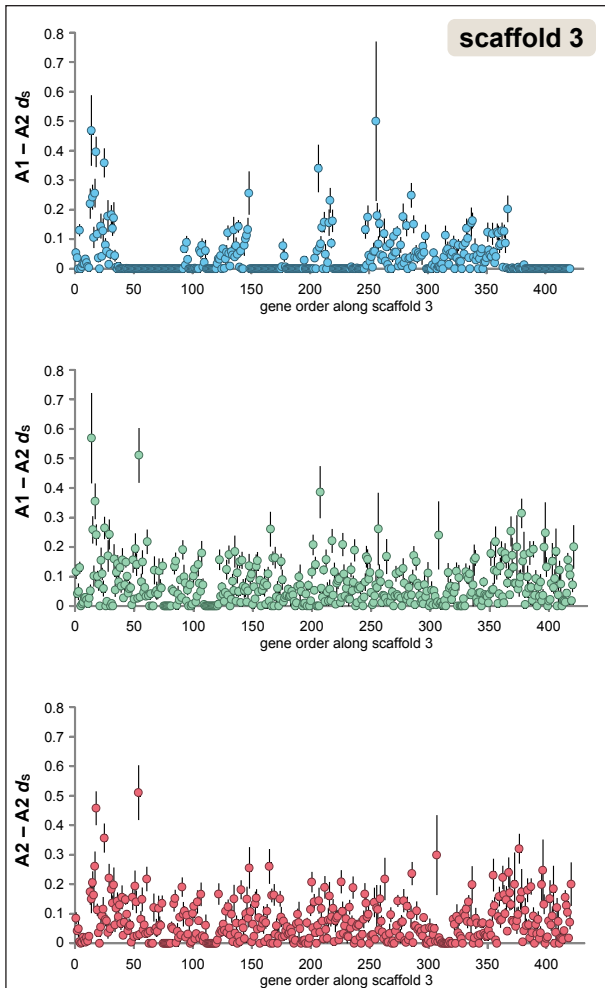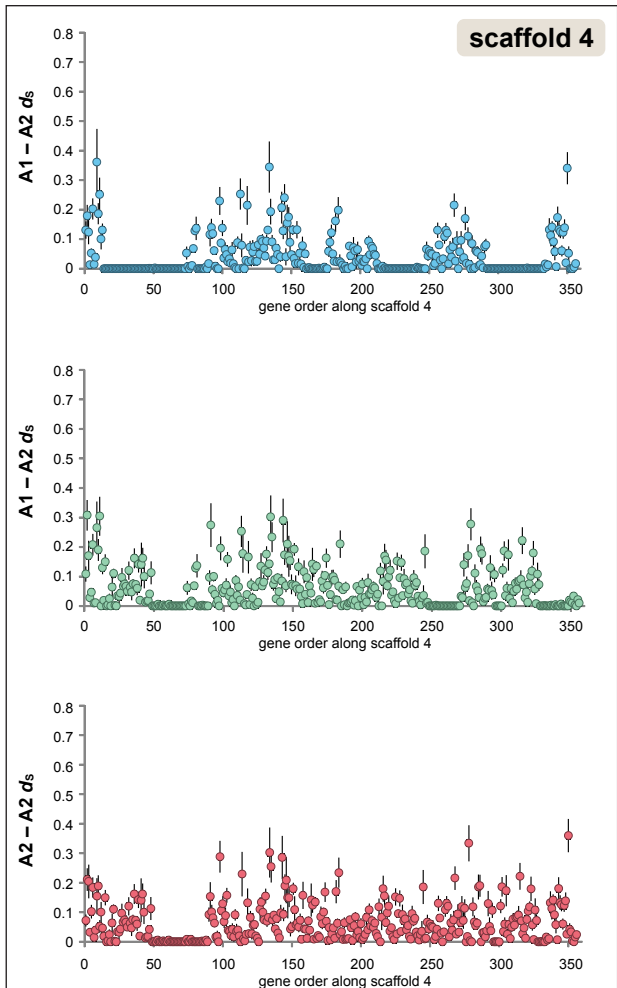

● CBS4282 (A1) vs. JCM1457 (A2) ● CBS4282 (A1) vs. UJ1 (A2) ● JCM1457 (A2) vs. UJ1 (A2)
