# Supplementary material for: Convergent evolution of linked mating-type loci in basidiomycete fungi
Source: PubMed Central journal article supplement (PMC6730849; doi:10.1371/journal.pgen.1008365), 2019-09-06

*C. cutaneum*  
JCM1462

*C. oleaginosum*  
ATCC20508

*C. dermatis*  
JCM11170

*C. arboriformis*  
JCM14201

*C. daszewskae*  
JCM11166

*C. curvatus*  
JCM1532

*C. cyanovorans*  
JCM318333

*T. faecale*  
JCM2941

*T. asahii*  
CBS8904

*T. inkin*  
JCM9195

*A. laibachii*  
JCM2947

*A. gracile*  
JCM10018

*A. veenhuisii*  
JCM10691

*A. domesticum*  
JCM9580

*A. porosum*  
DSM27194

*A. porosum*  
JCM1458

*V. humicola*  
CBS4282

*V. humicola*  
JCM1457

*Ta. koratensis*  
JCM12878

*Ta. tepidaria*  
JCM11965

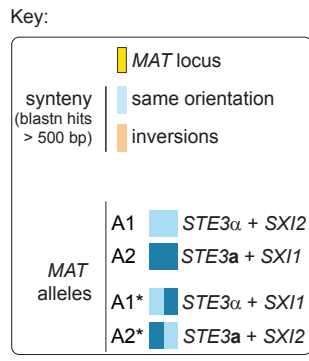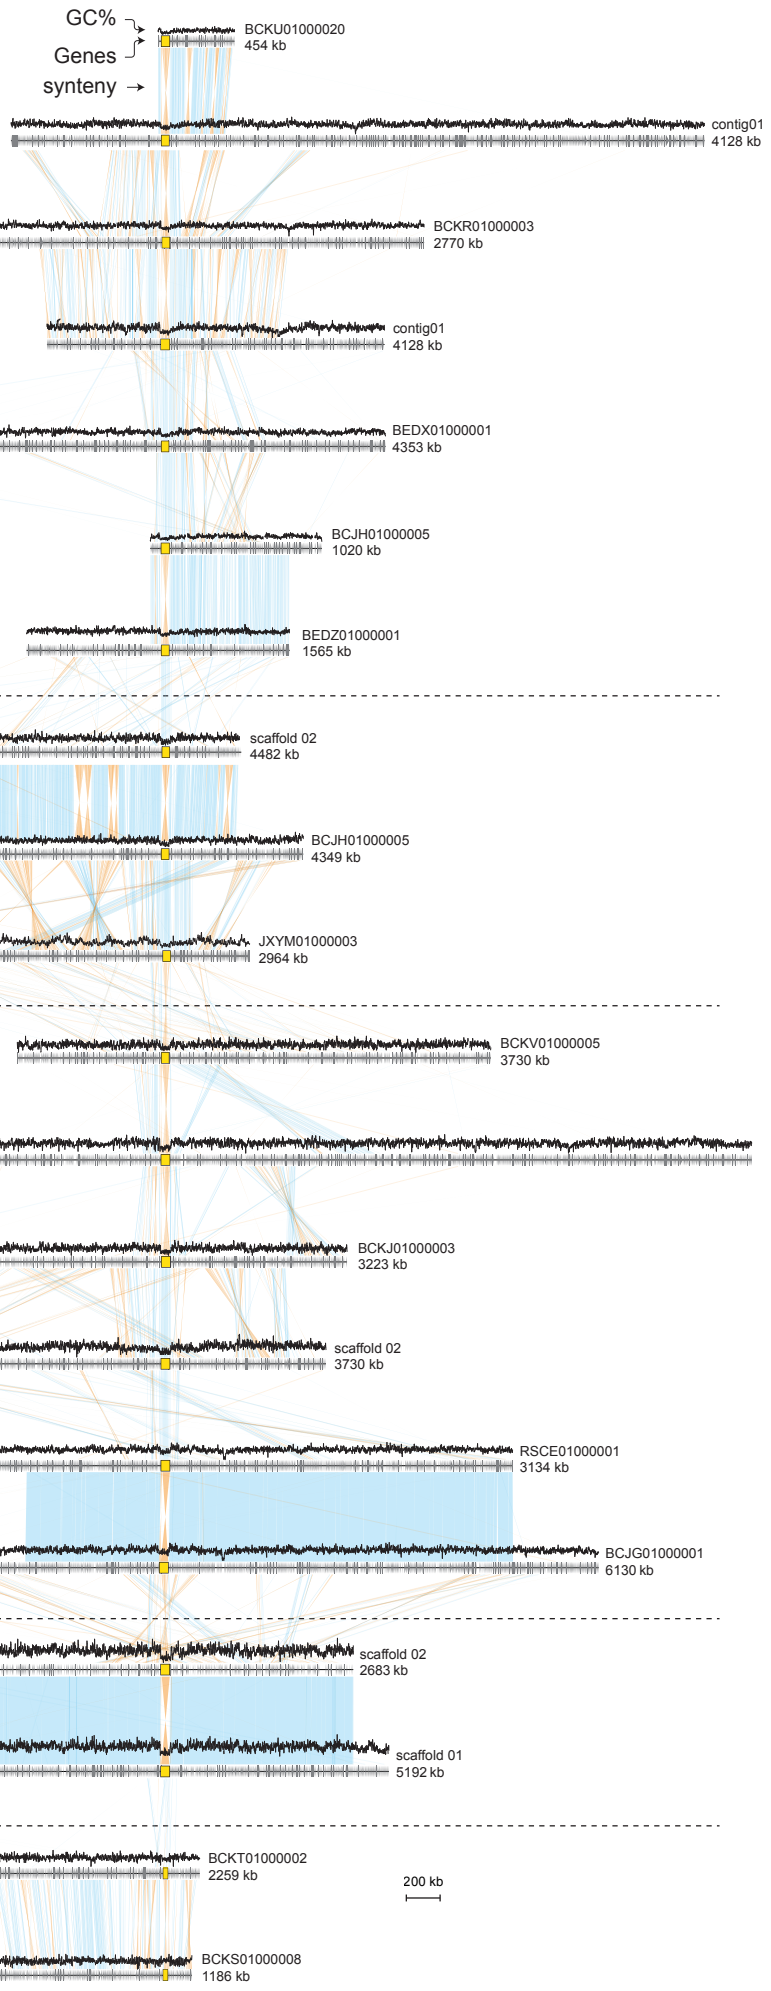

Supplement: pgen.1008365.s010.pdf [file pgen.1008365.s010.pdf]
