# Supplementary material for: Convergent evolution of linked mating-type loci in basidiomycete fungi
Source: PubMed Central journal article supplement (PMC6730849; doi:10.1371/journal.pgen.1008365), 2019-09-06

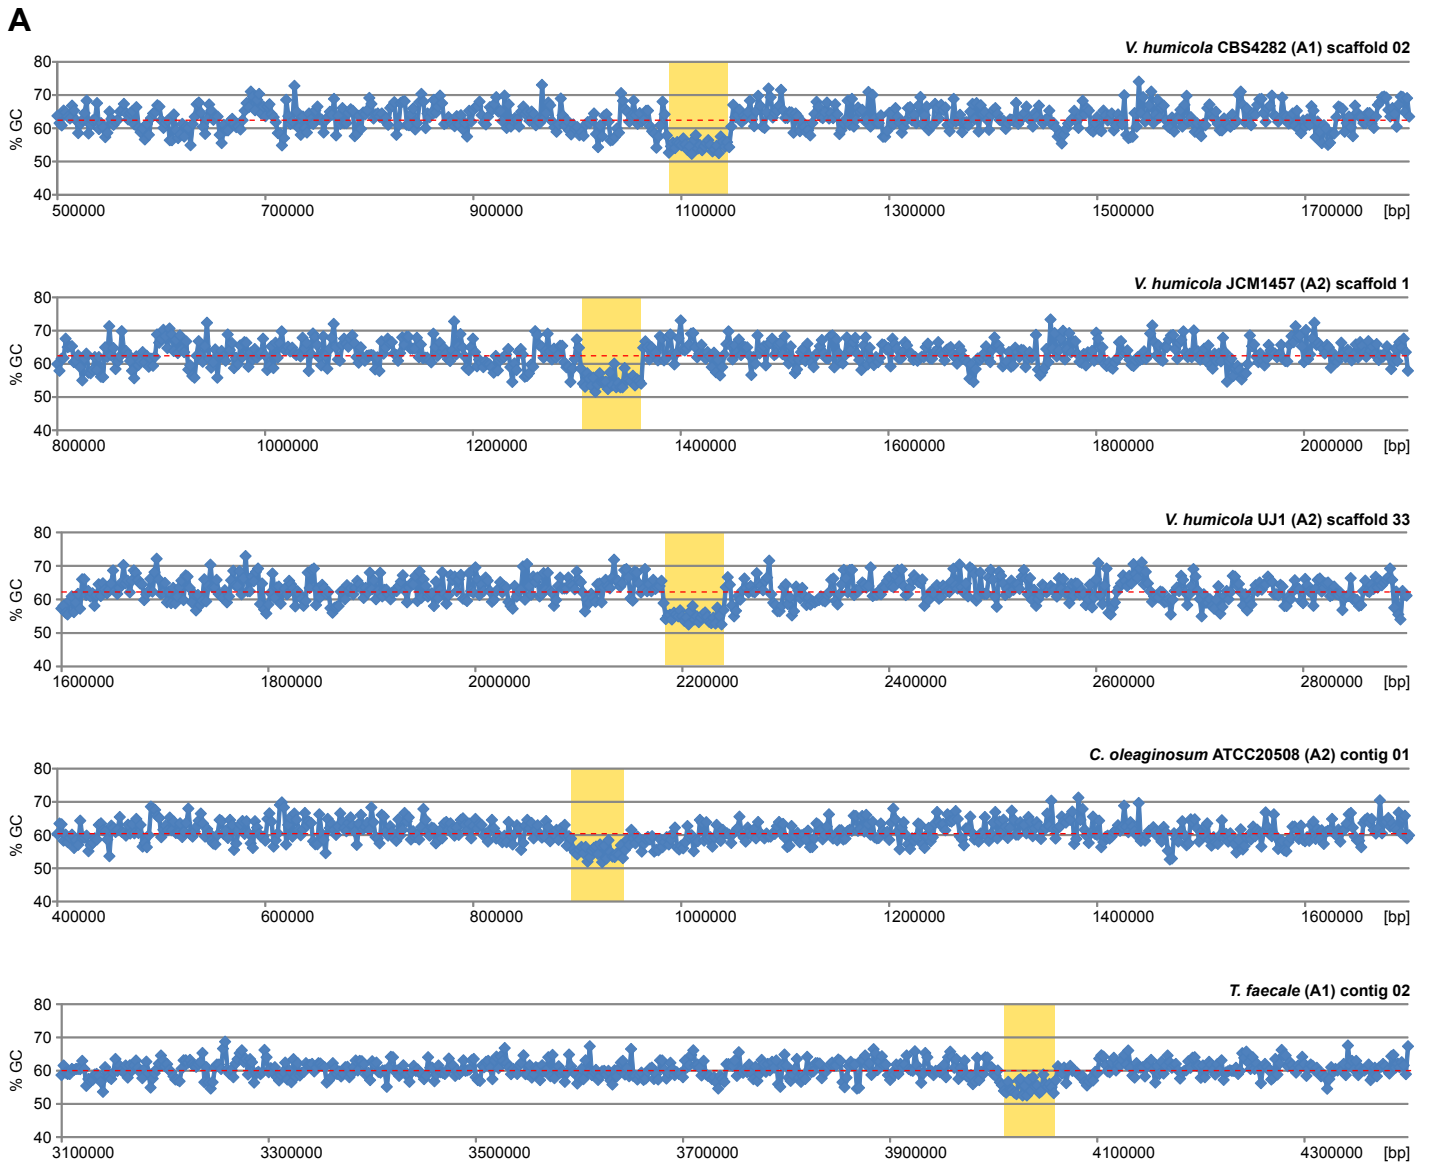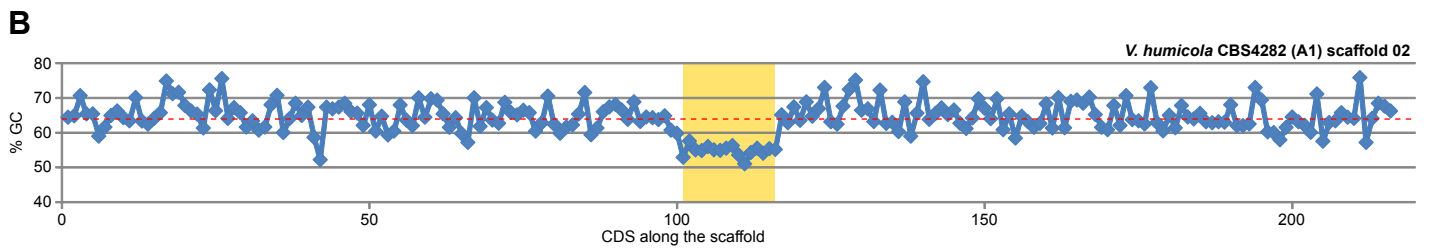

Supplement: pgen.1008365.s011.pdf [file pgen.1008365.s011.pdf]
