# Supplementary material for: Convergent evolution of linked mating-type loci in basidiomycete fungi
Source: PubMed Central journal article supplement (PMC6730849; doi:10.1371/journal.pgen.1008365), 2019-09-06
Supplement: pgen.1008365.s014.pdf [file pgen.1008365.s014.pdf]

**S3 Table. Oligonucleotides used in this study.**

| <b>Name</b> | <b>Sequence</b>           | <b>Remarks</b>                                   |
|-------------|---------------------------|--------------------------------------------------|
| Vh_myo2_1   | tcttctggctctcgaatgtacagg  | <i>V. humicola</i> JCM1457 within <i>MYO2</i>    |
| Vh_myo2_2   | cagctgatcactcttattcttctgg | <i>V. humicola</i> JCM1457 within <i>MYO2</i>    |
| Vh_sxi1_1   | atgacggcgcctgtaagtactgc   | <i>V. humicola</i> JCM1457 within <i>SXI1</i>    |
| Vh_sxi1_2   | cgaagggtggaatgagcatcttcc  | <i>V. humicola</i> JCM1457 within <i>SXI1</i>    |
| Vh_ste3_1   | gtggaacattatcggettgtctgc  | <i>V. humicola</i> JCM1457 within <i>STE3</i>    |
| Vh_ste3_2   | tcagggaaactgcgagataagatcg | <i>V. humicola</i> JCM1457 within <i>STE3</i>    |
| Vh_rpl22_1  | gctcaggctacttcaagggtgacc  | <i>V. humicola</i> JCM1457 within <i>RPL22</i>   |
| Vh_01_283_1 | tcggctaggaaagtgtgaagtgc   | <i>V. humicola</i> JCM1457 within <i>001_283</i> |
